# Supplementary material for: Machine Learning Predicts Prolonged Acute Hypoxemic Respiratory Failure in Pediatric Severe Influenza
Source: PubMed Central journal article supplement — Crit Care Explor. 2020 Aug 6;2(8):e0175. doi: 10.1097/CCE.0000000000000175 (PMC7417145; doi:10.1097/cce.0000000000000175), 2020-08-06

# **Machine Learning Predicts Prolonged Acute Hypoxemic Respiratory Failure in Pediatric Severe Influenza**

## **Supplemental Digital Content**

Michaël S. Sauthier MD<sup>1,2,3</sup>, Philippe A. Jouvét MD PhD MBA<sup>3</sup>, Margaret M. Newhams MPH<sup>1</sup>, Adrienne G. Randolph MD MSc<sup>1,4</sup> on behalf of the PALISI Pediatric Intensive Care Influenza (PICFLU) Network

- 1- Department of Anesthesiology, Critical Care and Pain Medicine, Boston Children's Hospital, Boston, MA.
- 2- Department of Biomedical Informatics, Harvard Medical School, Boston, MA.
- 3- Departments of Pediatrics, Sainte-Justine Hospital, Montreal (Canada)
- 4- Departments of Anaesthesia and Pediatrics, Harvard Medical School, Boston, MA.

### **Corresponding author:**

Adrienne G. Randolph

Division of Critical Care Medicine, Bader 634, Boston

Children's Hospital, 300 Longwood Ave., Boston, MA 02115

[adrienne.randolph@childrens.harvard.edu](mailto:adrienne.randolph@childrens.harvard.edu)

## Supplemental Digital Content

**SDC 1:** Performance of all models with 95% confidence interval. Sensitivity, specificity, positive predictive value, negative predictive value and accuracy were calculated using probability cutoff of 0.5.

| Models                      | Timing | Algorithm | AUC                 | Sensitivity         | Specificity         | Pos. pred. value    | Neg pred value      | Accuracy            |
|-----------------------------|--------|-----------|---------------------|---------------------|---------------------|---------------------|---------------------|---------------------|
| OI                          | Day 1  | LR        | 0.78<br>(0.74–0.81) | 0.56<br>(0.44–0.68) | 0.87<br>(0.76–0.97) | 0.76<br>(0.63–0.92) | 0.74<br>(0.68–0.79) | 0.74<br>(0.7–0.77)  |
| OI                          | Day 1  | RF        | 0.69<br>(0.62–0.74) | 0.51<br>(0.41–0.62) | 0.79<br>(0.72–0.84) | 0.63<br>(0.55–0.71) | 0.69<br>(0.64–0.74) | 0.67<br>(0.63–0.71) |
| PF                          | Day 1  | LR        | 0.72<br>(0.68–0.75) | 0.75<br>(0.65–0.85) | 0.56<br>(0.39–0.69) | 0.57<br>(0.48–0.66) | 0.74<br>(0.69–0.8)  | 0.64<br>(0.57–0.69) |
| PF                          | Day 1  | RF        | 0.71<br>(0.62–0.77) | 0.77<br>(0.65–0.86) | 0.61<br>(0.36–0.71) | 0.61<br>(0.48–0.68) | 0.78<br>(0.67–0.85) | 0.68<br>(0.54–0.73) |
| OSI                         | Day 1  | LR        | 0.8<br>(0.76–0.84)  | 0.77<br>(0.6–0.89)  | 0.62<br>(0.48–0.75) | 0.62<br>(0.55–0.7)  | 0.77<br>(0.67–0.88) | 0.68<br>(0.64–0.72) |
| OSI                         | Day 1  | RF        | 0.69<br>(0.61–0.79) | 0.67<br>(0.54–0.9)  | 0.56<br>(0.46–0.66) | 0.55<br>(0.48–0.61) | 0.68<br>(0.6–0.87)  | 0.61<br>(0.56–0.69) |
| SF                          | Day 1  | LR        | 0.75<br>(0.72–0.78) | 0.67<br>(0.56–0.76) | 0.72<br>(0.62–0.79) | 0.49<br>(0.41–0.56) | 0.84<br>(0.79–0.88) | 0.7<br>(0.65–0.74)  |
| SF                          | Day 1  | RF        | 0.79<br>(0.73–0.84) | 0.64<br>(0.29–0.83) | 0.76<br>(0.66–0.89) | 0.52<br>(0.42–0.61) | 0.84<br>(0.74–0.92) | 0.73<br>(0.67–0.78) |
| OSI (all SpO <sub>2</sub> ) | Day 1  | LR        | 0.77<br>(0.74–0.79) | 0.51<br>(0.42–0.59) | 0.92<br>(0.88–0.97) | 0.7<br>(0.6–0.82)   | 0.85<br>(0.82–0.88) | 0.82<br>(0.8–0.84)  |
| OSI (all SpO <sub>2</sub> ) | Day 1  | RF        | 0.76<br>(0.73–0.79) | 0.52<br>(0.39–0.62) | 0.89<br>(0.84–0.93) | 0.61<br>(0.51–0.7)  | 0.85<br>(0.81–0.88) | 0.8<br>(0.76–0.83)  |
| SF (all SpO <sub>2</sub> )  | Day 1  | LR        | 0.77<br>(0.74–0.8)  | 0.27<br>(0.01–0.62) | 0.92<br>(0.79–1)    | 0.7<br>(0.45–1)     | 0.8<br>(0.74–0.87)  | 0.75<br>(0.73–0.78) |
| SF (all SpO <sub>2</sub> )  | Day 1  | RF        | 0.78<br>(0.72–0.82) | 0.59<br>(0.34–0.72) | 0.83<br>(0.75–0.9)  | 0.53<br>(0.45–0.62) | 0.86<br>(0.79–0.9)  | 0.77<br>(0.72–0.8)  |
| Multivariables              | Day 1  | LR        | 0.82<br>(0.79–0.85) | 0.55<br>(0.48–0.64) | 0.89<br>(0.85–0.93) | 0.63<br>(0.55–0.72) | 0.86<br>(0.83–0.88) | 0.81<br>(0.78–0.83) |
| Multivariables              | Day 1  | RF        | 0.9<br>(0.85–0.93)  | 0.67<br>(0.57–0.78) | 0.93<br>(0.88–0.97) | 0.76<br>(0.66–0.86) | 0.9<br>(0.86–0.93)  | 0.86<br>(0.83–0.89) |
| OI                          | Day 2  | LR        | 0.76<br>(0.73–0.79) | 0.55<br>(0.4–0.68)  | 0.79<br>(0.71–0.93) | 0.69<br>(0.62–0.85) | 0.68<br>(0.62–0.75) | 0.68<br>(0.65–0.71) |
| OI                          | Day 2  | RF        | 0.73<br>(0.66–0.78) | 0.63<br>(0.52–0.72) | 0.74<br>(0.64–0.81) | 0.67<br>(0.59–0.74) | 0.7<br>(0.64–0.76)  | 0.69<br>(0.63–0.73) |
| PF                          | Day 2  | LR        | 0.72<br>(0.69–0.75) | 0.61<br>(0–0.9)     | 0.7<br>(0.29–1)     | 0.66<br>(0.48–0.84) | 0.69<br>(0.51–0.8)  | 0.65<br>(0.5–0.71)  |
| PF                          | Day 2  | RF        | 0.68<br>(0.61–0.73) | 0.67<br>(0.54–0.75) | 0.63<br>(0.51–0.73) | 0.61<br>(0.54–0.68) | 0.68<br>(0.6–0.74)  | 0.65<br>(0.58–0.69) |
| OSI                         | Day 2  | LR        | 0.84<br>(0.79–0.88) | 0.68<br>(0.44–0.9)  | 0.84<br>(0.71–0.99) | 0.78<br>(0.66–0.97) | 0.78<br>(0.67–0.91) | 0.77<br>(0.72–0.81) |
| OSI                         | Day 2  | RF        | 0.74<br>(0.66–0.8)  | 0.58<br>(0.42–0.73) | 0.78<br>(0.68–0.85) | 0.67<br>(0.56–0.74) | 0.71<br>(0.62–0.79) | 0.69<br>(0.61–0.76) |
| SF                          | Day 2  | LR        | 0.77<br>(0.74–0.8)  | 0.66<br>(0.44–0.76) | 0.76<br>(0.64–0.87) | 0.57<br>(0.46–0.65) | 0.83<br>(0.75–0.87) | 0.73<br>(0.67–0.77) |
| SF                          | Day 2  | RF        | 0.69<br>(0.63–0.74) | 0.47<br>(0.35–0.61) | 0.77<br>(0.66–0.84) | 0.49<br>(0.39–0.58) | 0.76<br>(0.71–0.8)  | 0.67<br>(0.61–0.72) |
| OSI (all SpO <sub>2</sub> ) | Day 2  | LR        | 0.78<br>(0.75–0.8)  | 0.49<br>(0.41–0.57) | 0.95<br>(0.89–0.98) | 0.77<br>(0.62–0.9)  | 0.85<br>(0.82–0.87) | 0.83<br>(0.81–0.86) |

|                               |         |    |                     |                     |                     |                     |                     |                     |
|-------------------------------|---------|----|---------------------|---------------------|---------------------|---------------------|---------------------|---------------------|
| OSI (all SpO <sub>2</sub> )   | Day 2   | RF | 0.78<br>(0.75–0.81) | 0.56<br>(0.44–0.67) | 0.92<br>(0.87–0.95) | 0.69<br>(0.59–0.8)  | 0.86<br>(0.83–0.9)  | 0.83<br>(0.79–0.86) |
| SF (all SpO <sub>2</sub> )    | Day 2   | LR | 0.79<br>(0.76–0.81) | 0.53<br>(0.36–0.64) | 0.87<br>(0.77–0.94) | 0.58<br>(0.46–0.67) | 0.85<br>(0.8–0.88)  | 0.78<br>(0.74–0.81) |
| SF (all SpO <sub>2</sub> )    | Day 2   | RF | 0.75<br>(0.71–0.8)  | 0.43<br>(0.31–0.57) | 0.87<br>(0.79–0.93) | 0.54<br>(0.42–0.66) | 0.82<br>(0.79–0.86) | 0.76<br>(0.72–0.8)  |
| Multivariables                | Day 2   | LR | 0.86<br>(0.83–0.88) | 0.61<br>(0.52–0.7)  | 0.87<br>(0.81–0.92) | 0.62<br>(0.52–0.71) | 0.87<br>(0.84–0.9)  | 0.81<br>(0.77–0.83) |
| Multivariables                | Day 2   | RF | 0.93<br>(0.89–0.95) | 0.69<br>(0.59–0.79) | 0.94<br>(0.89–0.97) | 0.79<br>(0.68–0.88) | 0.9<br>(0.87–0.93)  | 0.88<br>(0.85–0.9)  |
| OI                            | Day 1+2 | LR | 0.81<br>(0.77–0.84) | 0.66<br>(0.54–0.81) | 0.77<br>(0.69–0.88) | 0.74<br>(0.67–0.84) | 0.71<br>(0.63–0.82) | 0.72<br>(0.66–0.77) |
| OI                            | Day 1+2 | RF | 0.82<br>(0.75–0.86) | 0.71<br>(0.54–0.84) | 0.79<br>(0.6–0.89)  | 0.76<br>(0.62–0.87) | 0.74<br>(0.64–0.84) | 0.75<br>(0.65–0.83) |
| PF                            | Day 1+2 | LR | 0.73<br>(0.67–0.77) | 0.79<br>(0.68–0.9)  | 0.52<br>(0.35–0.68) | 0.63<br>(0.54–0.72) | 0.71<br>(0.64–0.81) | 0.66<br>(0.6–0.72)  |
| PF                            | Day 1+2 | RF | 0.79<br>(0.73–0.85) | 0.82<br>(0.64–0.96) | 0.63<br>(0.49–0.77) | 0.7<br>(0.61–0.77)  | 0.79<br>(0.64–0.95) | 0.73<br>(0.65–0.8)  |
| OSI                           | Day 1+2 | LR | 0.82<br>(0.74–0.87) | 0.79<br>(0.55–1)    | 0.63<br>(0.27–0.91) | 0.7<br>(0.54–0.88)  | 0.77<br>(0.61–1)    | 0.71<br>(0.6–0.77)  |
| OSI                           | Day 1+2 | RF | 0.72<br>(0.61–0.8)  | 0.64<br>(0.44–0.83) | 0.59<br>(0.41–0.83) | 0.62<br>(0.51–0.77) | 0.61<br>(0.49–0.76) | 0.61<br>(0.52–0.71) |
| SF                            | Day 1+2 | LR | 0.82<br>(0.78–0.85) | 0.73<br>(0.58–0.86) | 0.74<br>(0.66–0.8)  | 0.59<br>(0.52–0.64) | 0.85<br>(0.77–0.91) | 0.74<br>(0.7–0.76)  |
| SF                            | Day 1+2 | RF | 0.81<br>(0.76–0.85) | 0.68<br>(0.47–0.86) | 0.8<br>(0.7–0.9)    | 0.64<br>(0.54–0.75) | 0.84<br>(0.75–0.92) | 0.76<br>(0.71–0.81) |
| OSI (all SpO <sub>2</sub> )   | Day 1+2 | LR | 0.78<br>(0.75–0.8)  | 0.51<br>(0.43–0.61) | 0.94<br>(0.88–0.98) | 0.75<br>(0.62–0.87) | 0.85<br>(0.83–0.88) | 0.83<br>(0.81–0.86) |
| OSI (all SpO <sub>2</sub> )   | Day 1+2 | RF | 0.78<br>(0.75–0.81) | 0.58<br>(0.46–0.7)  | 0.91<br>(0.87–0.95) | 0.69<br>(0.59–0.8)  | 0.87<br>(0.83–0.9)  | 0.83<br>(0.79–0.86) |
| SF (all SpO <sub>2</sub> )    | Day 1+2 | LR | 0.8<br>(0.78–0.83)  | 0.62<br>(0.49–0.71) | 0.82<br>(0.75–0.88) | 0.53<br>(0.46–0.61) | 0.87<br>(0.82–0.9)  | 0.77<br>(0.73–0.79) |
| SF (all SpO <sub>2</sub> )    | Day 1+2 | RF | 0.83<br>(0.78–0.87) | 0.62<br>(0.48–0.76) | 0.86<br>(0.79–0.92) | 0.6<br>(0.51–0.71)  | 0.87<br>(0.83–0.91) | 0.8<br>(0.76–0.83)  |
| Multivariables                | Day 1+2 | LR | 0.86<br>(0.83–0.89) | 0.64<br>(0.52–0.75) | 0.86<br>(0.81–0.91) | 0.61<br>(0.53–0.69) | 0.88<br>(0.84–0.91) | 0.81<br>(0.77–0.83) |
| Multivariables                | Day 1+2 | RF | 0.93<br>(0.9–0.95)  | 0.71<br>(0.6–0.82)  | 0.93<br>(0.88–0.97) | 0.78<br>(0.67–0.88) | 0.91<br>(0.87–0.94) | 0.88<br>(0.85–0.91) |
| Multivariables (reduced)      | Day 1+2 | LR | 0.84<br>(0.81–0.87) | 0.59<br>(0.48–0.69) | 0.9<br>(0.85–0.94)  | 0.68<br>(0.57–0.77) | 0.87<br>(0.83–0.9)  | 0.83<br>(0.79–0.85) |
| Multivariables (reduced)      | Day 1+2 | RF | 0.91<br>(0.88–0.94) | 0.72<br>(0.61–0.83) | 0.91<br>(0.86–0.96) | 0.74<br>(0.64–0.85) | 0.91<br>(0.87–0.94) | 0.86<br>(0.83–0.89) |
| Multivariables (reduced+year) | Day 1+2 | LR | 0.84<br>(0.8–0.86)  | 0.6<br>(0.48–0.71)  | 0.9<br>(0.84–0.94)  | 0.67<br>(0.55–0.76) | 0.87<br>(0.83–0.9)  | 0.82<br>(0.78–0.85) |
| Multivariables (reduced+year) | Day 1+2 | RF | 0.92<br>(0.88–0.94) | 0.72<br>(0.61–0.84) | 0.92<br>(0.87–0.97) | 0.76<br>(0.66–0.87) | 0.91<br>(0.87–0.94) | 0.87<br>(0.84–0.9)  |

AUC: area under the ROC curve, RF: random forests, LR: logistic regression.

**SDC 2:** Importance of predictors in random forest models using the error rate classification after permutation of the predictors. MAwP: mean airway pressure.

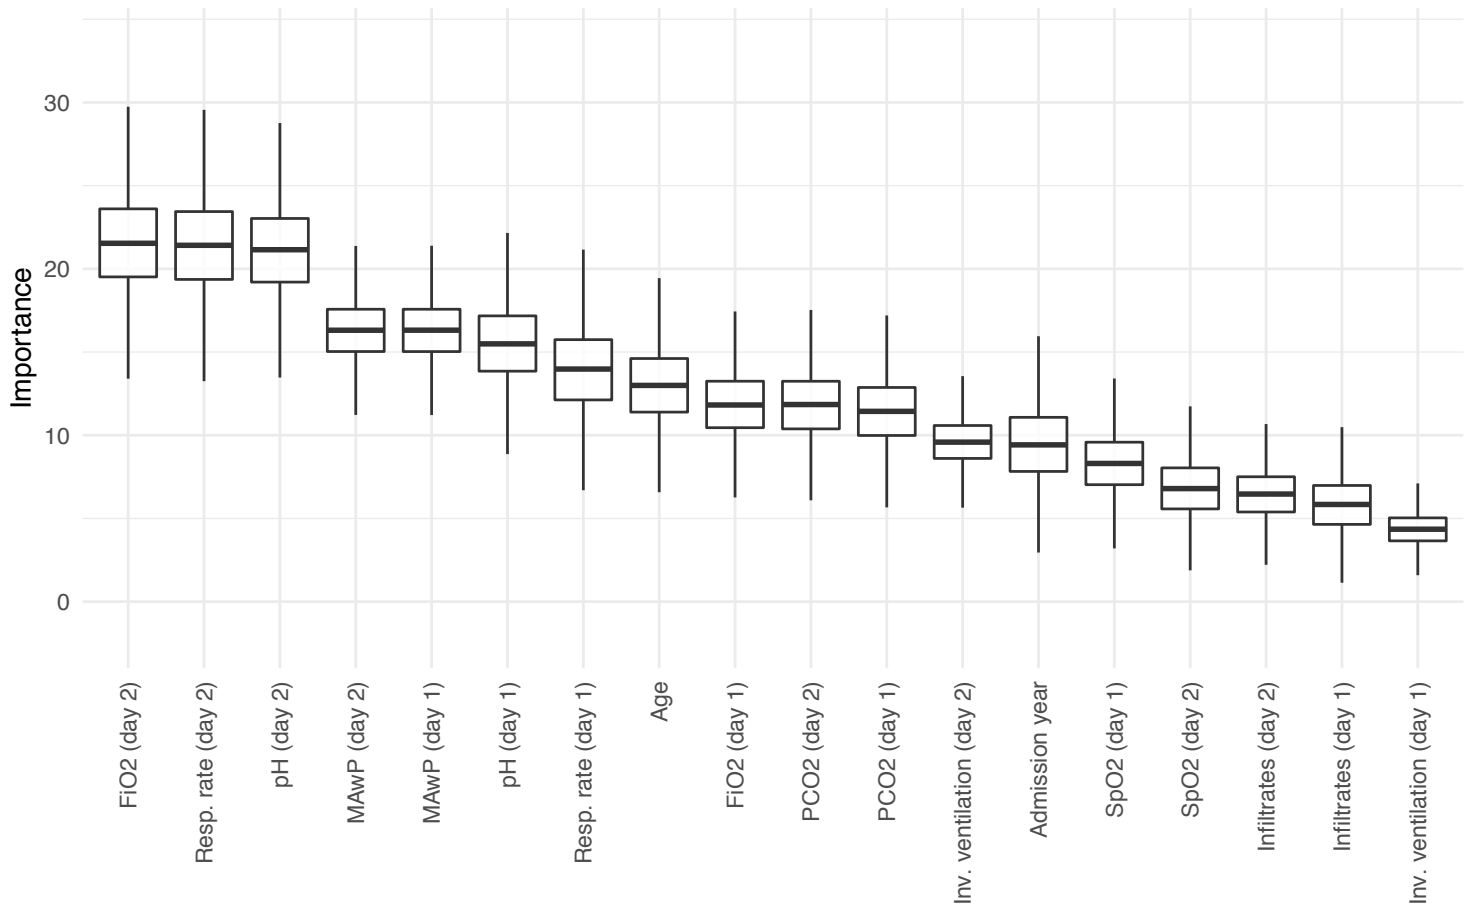

Supplement: cc9-2-e0175-s001.pdf [file cc9-2-e0175-s001.pdf]
